# Supplementary material
Source: MDPI journal article supplement (https://www.mdpi.com/2073-4433/12/2/270)
Supplement: s1 [file s1]

# Evaluation and Application of A Novel Low-cost Wearable Sensing Device in Assessing Real-time PM<sub>2.5</sub> Exposure in Major Asian Transportation Modes

Wen-Cheng Vincent Wang <sup>1</sup>, Shih-Chun Candice Lung <sup>1,2,3\*</sup>, Chun-Hu Liu <sup>1</sup>, Tzu-Yao Julia Wen <sup>1</sup>, Shu-Chuan Hu <sup>1</sup>, Ling-Jyh Chen <sup>4</sup>

<sup>1</sup> Research Center for Environmental Changes, Academia Sinica, Taipei 115, Taiwan;

phdzen@gate.sinica.edu.tw (W.-C.V.W.); lch0909@gate.sinica.edu.tw (C.-H.L.);

zywen@gate.sinica.edu.tw (T.-Y.J.W.); joannehu@gate.sinica.edu.tw (S.-C.H.)

<sup>2</sup> Department of Atmospheric Sciences, National Taiwan University, Taipei 106, Taiwan

<sup>3</sup> Institute of Environmental Health, National Taiwan University, Taipei 106, Taiwan

<sup>4</sup> Institute of Information Science, Academia Sinica, Taipei 115, Taiwan; clljj@iis.sinica.edu.tw

\* Correspondence: sclung@rcec.sinica.edu.tw; Tel.: 886-2-27875908

## Supplemental Materials

### Table of Content

**Parts and cost of LASS (Page 2)**

**Temperature and humidity conditions of six transportation modes (Page 2)**

**Table S1.** The correlation coefficients of five air quality stations in Taipei in 2016. **(Page 3)**

**Table S2.** Sample size of monitoring with (a) LASS in 2016, (b) GRIMM in 2016, (c) PEM in 2004, and (d) PEM in 2005. **(Page 4)**

**Table S3.** Ambient PM levels from nearby monitoring stations of Taiwan Environmental Protection Administration. **(Page 5)**

**Table S4.** Mean values of absolute error and accuracy of LASS measurements in the six transportation modes. **(Page 6)**

**Table S5.** The results of multiple regression analysis with the converted LASS, GRIMM, temperature, and relative humidity (RH) in the six transportation modes. **(Page 7)**

**Table S6.** Coefficients of regression analysis with dummy variables for different transportation modes. **(Page 8)**

**Figure S1.** Monitoring Routes in (a) 2016 (the green line) and (b) 2004 and 2005 (car and scooter on the blue line; MRT on the yellow line) in Taipei. **(Page 9)**

**Figure S2.** Two research staff carried GRIMM and LASS; GRIMM and LASS are marked with red cycles. **(Page 10)**

**Figure S3.** Comparison of GRIMM with (a) PM<sub>10</sub> of PMS3003 in laboratory (n = 12208), and (b) PM<sub>10</sub> of LASS observations in field converted by the correction equation shown in (a) (n=1673); the data presented were 5-min averages. **(Page 11)**

**Parts and cost of LASS**

Website: [http://www.icshop.com.tw/product\\_info.php/products\\_id/20524](http://www.icshop.com.tw/product_info.php/products_id/20524)

Parts:

- Linkit One mainboard
- G3 Sensor (Plantower PMS3003)
- GPS Sensor
- Wi-Fi module
- DHT22 Temperature and RH Sensor

Total cost: 3199 NT dollars, ~ 107 \$USD

Considering the extra cost for designing and printing the outer cases with a 3D printer by a machine shop, the total cost were ~ 150USD per LASS.

**Temperature and humidity conditions of six transportation modes**

The temperature and RH conditions of the three air-conditioned transportation modes were 27.5-34.6 °C and 47.5-80.3%, 26.3-37.2 °C and 34.7-77.7%, and 23.4-39.0 °C and 25.2-71.4% in MRT, bus, and car modes, respectively. For the other three modes, the temperature ranges were 28.9-42.5 °C, 29.1-42.0 °C, and 28.7-39.4 °C and RH ranges were 40.5-84.4%, 41.3-82.0%, and 46.0-81.7% in scooter, bike, and walk modes, respectively. The air-conditioned transportation modes covered lower temperature ranges, with bus and car having obviously lower RH ranges compared to the other modes.

**Table S1.** The correlation coefficients of five air quality stations in Taipei in 2016.

|   | A     | B     | C     | D     | E     |
|---|-------|-------|-------|-------|-------|
| A | 1.000 |       |       |       |       |
| B | 0.930 | 1.000 |       |       |       |
| C | 0.931 | 0.994 | 1.000 |       |       |
| D | 0.957 | 0.950 | 0.967 | 1.000 |       |
| E | 0.930 | 0.992 | 0.993 | 0.971 | 1.000 |

<sup>a</sup> Station A: Guting; station B: Zhongshan; station C: Wanhua; station D: Shilin; station E: Songshan.

<sup>b</sup> Data source: Taiwan Environmental Protection Agency website,  
[https://data.epa.gov.tw/en/dataset/aqx\\_p\\_13](https://data.epa.gov.tw/en/dataset/aqx_p_13).

There are five Taiwan EPA air quality stations (Guting, Zhongshan, Wanhua, Shilin, and Songshan stations, which were named as stations A-E, respectively, in the Table S1) in the Taipei basin. Based on PM<sub>2.5</sub> data in 2016, the paired correlation coefficients of PM<sub>2.5</sub> variations for these five stations showed high correlation between these station. Therefore, these data showed evidence for our statement in the main text, “Taipei metropolitan is in a basin with pollutant levels in ambient air quite uniformly distributed spatially”.

**Table S2.** Sample size of monitoring with (a) LASS in 2016, (b) GRIMM in 2016, (c) PEM in 2004, and (d) PEM in 2005; one sample in 2016 representing one hour of monitoring while one sample in 2004-2005 representing monitoring for one complete monitoring duration (2 or 4 hours); data presented exclude rainy events.

| <b>(a)</b>                 |                |                 |                  |              |
|----------------------------|----------------|-----------------|------------------|--------------|
| <b>Transportation Mode</b> | <b>Morning</b> | <b>Noontime</b> | <b>Afternoon</b> | <b>Total</b> |
| MRT                        | 25             | 10              | 18               | 53           |
| Bus                        | 23             | 12              | 18               | 53           |
| Car                        | 26             | 11              | 23               | 60           |
| Scooter                    | 25             | 12              | 20               | 57           |
| Bike                       | 24             | 12              | 20               | 56           |
| Walk                       | 26             | 13              | 19               | 58           |
| <b>(b)</b>                 |                |                 |                  |              |
| <b>Transportation Mode</b> | <b>Morning</b> | <b>Noontime</b> | <b>Afternoon</b> | <b>Total</b> |
| MRT                        | 6              | 1               | 4                | 11           |
| Bus                        | 6              | 3               | 4                | 13           |
| Car                        | 27             | 12              | 23               | 62           |
| Scooter                    | 26             | 12              | 20               | 58           |
| Bike                       | 6              | 3               | 5                | 14           |
| Walk                       | 6              | 3               | 3                | 12           |
| <b>(c)</b>                 |                |                 |                  |              |
| <b>Transportation Mode</b> | <b>Morning</b> | <b>Noontime</b> | <b>Afternoon</b> | <b>Total</b> |
| MRT                        | 5              | 5               | 5                | 15           |
| Bus                        | --             | --              | --               | --           |
| Car                        | 5              | 5               | 5                | 15           |
| Scooter                    | 5              | 5               | 5                | 15           |
| Bike                       | --             | --              | --               | --           |
| Walk                       | --             | --              | --               | --           |
| <b>(d)</b>                 |                |                 |                  |              |
| <b>Transportation Mode</b> | <b>Morning</b> | <b>Noontime</b> | <b>Afternoon</b> | <b>Total</b> |
| MRT                        | 5              | 5               | 5                | 15           |
| Bus                        | --             | --              | --               | --           |
| Car                        | 5              | 5               | 5                | 15           |
| Scooter                    | 5              | 5               | 4                | 14           |
| Bike                       | --             | --              | --               | --           |
| Walk                       | --             | --              | --               | --           |

**Table S3.** Ambient PM levels from nearby monitoring stations of Taiwan Environmental Protection Administration.

| Monitoring period | PM <sub>2.5</sub> (µg/m <sup>3</sup> ) | PM <sub>10</sub> (µg/m <sup>3</sup> ) |
|-------------------|----------------------------------------|---------------------------------------|
|                   | mean (SD)                              | mean (SD)                             |
| 2004              | 26.8 (13.0)                            | 41.2 (18.5)                           |
| 2005              | 49.2 (19.0)                            | 56.4 (21.5)                           |
| 2016              | 18.5 (8.2)                             | 28.8 (9.4)                            |

**Table S4.** Mean values of absolute error and accuracy of LASS measurements in the six transportation modes.

| mode    | Overall                 |                       | Rush hours |           | Non-rush hours |           |
|---------|-------------------------|-----------------------|------------|-----------|----------------|-----------|
|         | AE <sup>1</sup>         | Accuracy <sup>2</sup> | AE         | Accuracy  | AE             | Accuracy  |
|         | mean (SD <sup>3</sup> ) | mean (SD)             | mean (SD)  | mean (SD) | mean (SD)      | mean (SD) |
| MRT     | 5.6 (5.4)               | 18 (12)               | 5 (5.5)    | 15 (12)   | 3.1 (1.1)      | 13 (5)    |
| Bus     | 2.4 (3.8)               | 12 (28)               | 1.9 (2)    | 10 (9)    | 1.4 (1.3)      | 8 (7)     |
| Car     | 1.4 (1.6)               | 25 (21)               | 1.5 (1.8)  | 23 (18)   | 1.3 (1.9)      | 27 (29)   |
| Scooter | 4.8 (4)                 | 22 (16)               | 5 (4)      | 23 (16)   | 6 (4.8)        | 24 (16)   |
| Bike    | 5.3 (5.6)               | 18 (11)               | 4.9 (4.2)  | 21 (11)   | 8.8 (8.1)      | 21 (9)    |
| Walk    | 2.5 (2)                 | 11 (8)                | 2.3 (1.7)  | 11 (8)    | 2 (1.4)        | 10 (7)    |
| Total   | 3.3 (3.9)               | 21 (18)               | 3.2 (3.6)  | 20 (16)   | 3.7 (4.7)      | 21 (21)   |

<sup>1</sup> AE (absolute error): |GRIMM-LASS| (µg/m<sup>3</sup>)

<sup>2</sup> Accuracy: |GRIMM-LASS|/GRIMM(%)

<sup>3</sup> SD: standard deviation

**Table S5.** The results of multiple regression analysis with the converted LASS, GRIMM, temperature, and relative humidity (RH) in the six transportation modes.

| <b>mode</b> | <b>adjusted R<sup>2</sup></b> | <b>intercept</b> | <b>GRIMM<br/>PM<sub>2.5</sub></b> | <b>Temperature</b> | <b>RH</b> |
|-------------|-------------------------------|------------------|-----------------------------------|--------------------|-----------|
| MRT         | 0.343                         | 90.1             | 0.39*                             | -1.63              | -0.40     |
| Bus         | 0.789                         | 4.4              | 0.88*                             | -0.06              | -0.01     |
| Car         | 0.883                         | -2.9             | 0.92*                             | 0.02               | 0.04*     |
| Scooter     | 0.736                         | 8.8              | 0.78*                             | -0.24              | -0.01     |
| Bike        | 0.898                         | -40.9            | 0.61*                             | 0.89               | 0.25      |
| Walk        | 0.863                         | -2.2             | 0.79*                             | 0.02               | 0.06      |

\* p-value < 0.05

**Table S6.** Coefficients of regression analysis with dummy variables for different transportation modes.

| mode                 | GRIMM                         |                           | LASS                          |                           |
|----------------------|-------------------------------|---------------------------|-------------------------------|---------------------------|
|                      | Non-standardized coefficients | Standardized coefficients | Non-standardized coefficients | Standardized coefficients |
| Intercept<br>(car)   | -26.7                         |                           | -19.2                         |                           |
| MRT                  | 15.9                          | 0.333                     | 15.6                          | 0.640                     |
| Bus                  | 4.6                           | 0.118                     | 6.7                           | 0.264                     |
| Scooter              | 9.9                           | 0.450                     | 8.1                           | 0.356                     |
| Bike                 | 9.3                           | 0.252                     | 6.1                           | 0.262                     |
| Walk                 | 4.9                           | 0.120                     | 7.1                           | 0.287                     |
| Air<br>temperature   | -0.1                          | -0.026                    | -0.3                          | -0.114                    |
| Relative<br>Humidity | 0.4                           | 0.425                     | 0.3                           | 0.386                     |



(a)

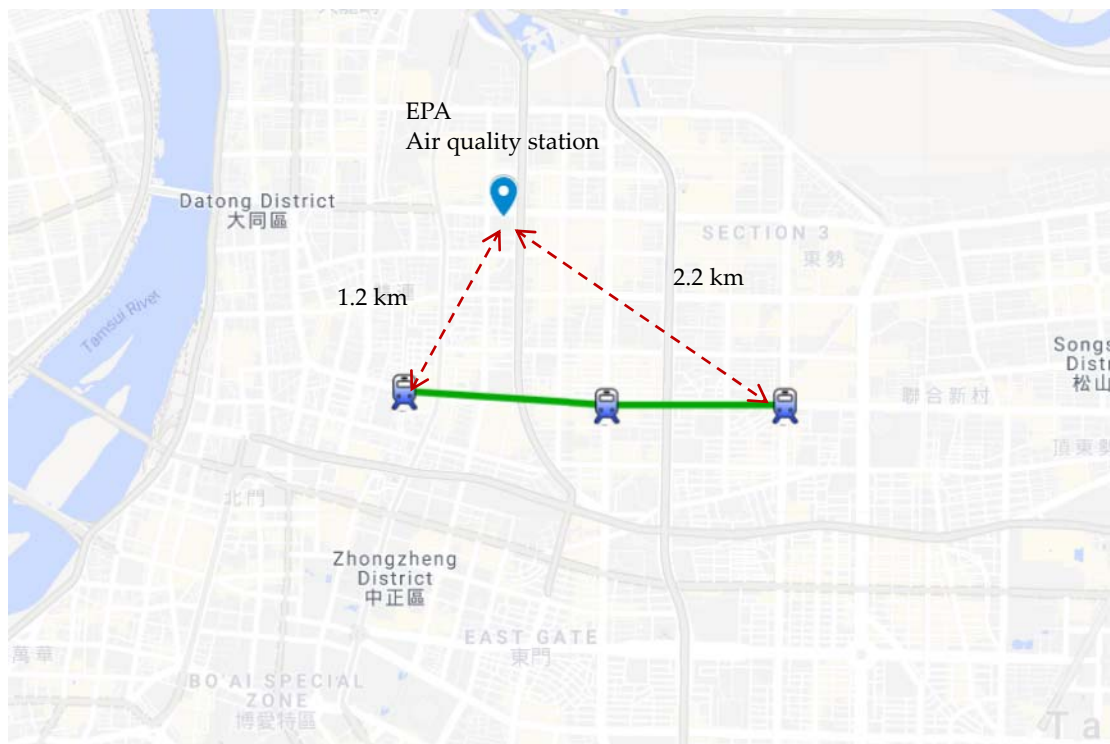

(b)

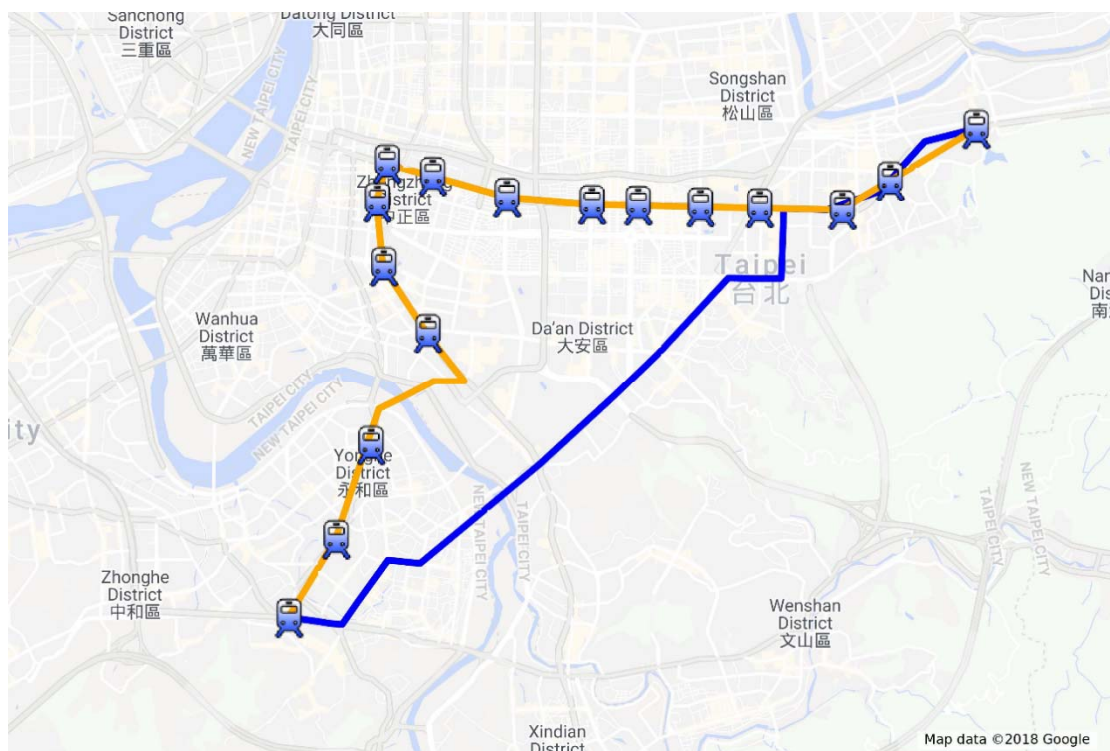

**Figure S1.** Monitoring Routes in (a) 2016 (the green line) and (b) 2004 and 2005 (car and scooter on the blue line; MRT on the yellow line) in Taipei.

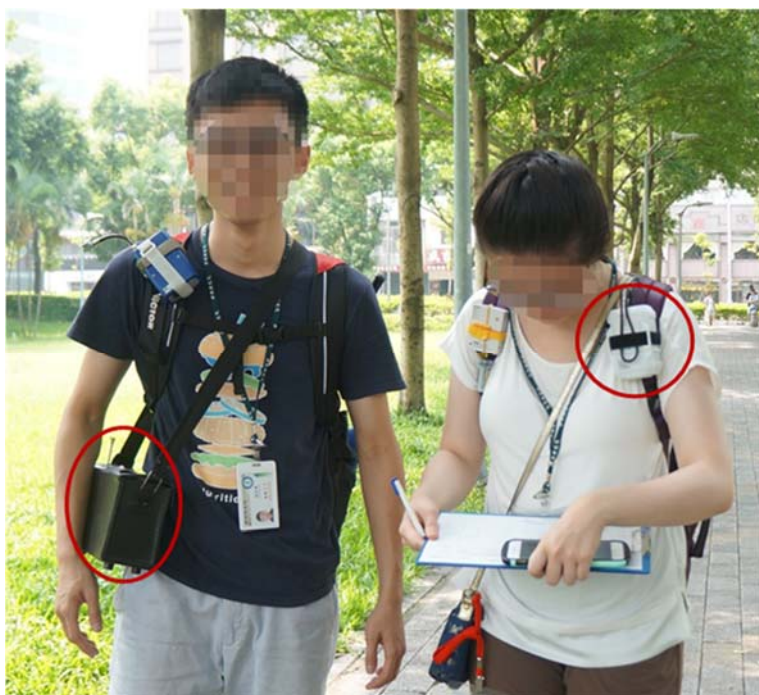

**Figure S2.** Two research staff carried GRIMM and LASS; GRIMM and LASS are marked with red cycles.

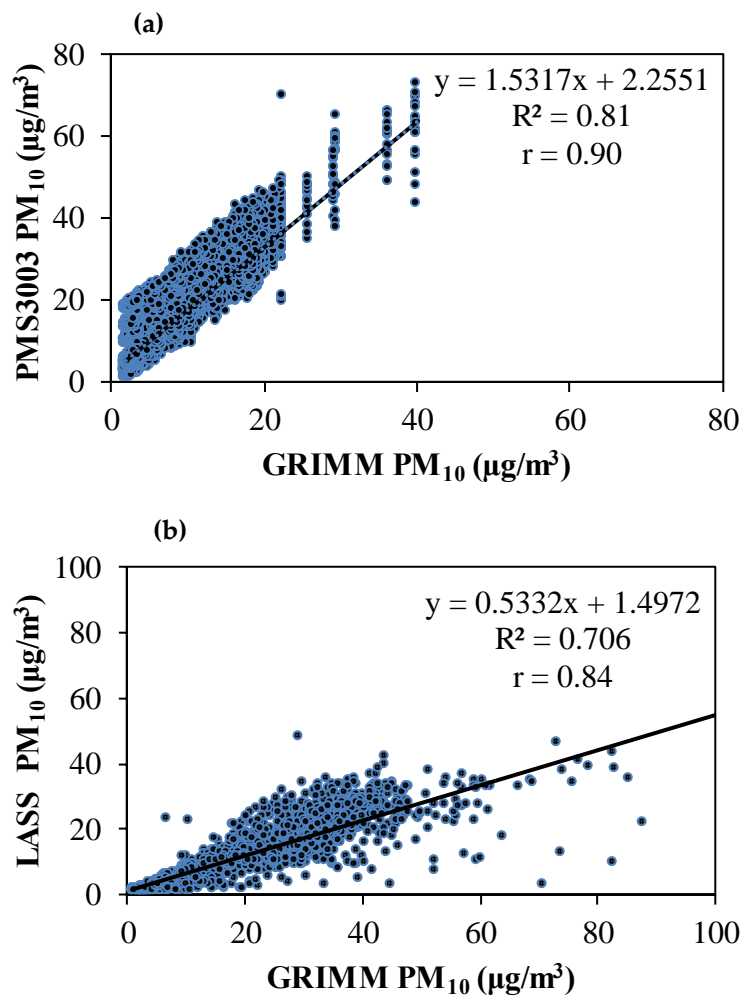

**Figure S3.** Comparison of GRIMM with (a) PM<sub>10</sub> of PMS3003 in laboratory (n=12208), and (b) PM<sub>10</sub> of LASS observations in field converted by the correction equation shown in (a) (n=1673); the data presented were 5-min averages.
